# Supplementary material for: Cellular senescence-mediated exacerbation of Duchenne muscular dystrophy
Source: PubMed Central journal article supplement (PMC7550355; doi:10.1038/s41598-020-73315-6), 2020-10-12
Supplement: 41598_2020_73315_MOESM1_ESM.pdf [file 41598_2020_73315_MOESM1_ESM.pdf]

## Supplementary Files

**Title: Cellular senescence-mediated exacerbation of Duchenne muscular dystrophy**

### Authors

Hidetoshi Sugihara<sup>1</sup>, Naomi Teramoto<sup>1</sup>, Katsuyuki Nakamura<sup>1</sup>, Takanori Shiga<sup>2</sup>, Taku Shirakawa<sup>3,4</sup>, Masafumi Matsuo<sup>3,4</sup>,

Masashi Ogasawara<sup>5,6</sup>, Ichizo Nishino<sup>5,6</sup>, Takashi Matsuwaki<sup>1</sup>, Masugi Nishihara<sup>1</sup>, Keitaro Yamanouchi<sup>1,\*</sup>

Supplementary Table

| Patients | Age | Diagnosis | Mutation                                                                 | Specimen | Nationality |
|----------|-----|-----------|--------------------------------------------------------------------------|----------|-------------|
| 1        | 4   | non-DMD   | No sign of muscle pathology on histology.                                | Biopsy   | Japan       |
| 2        | 4   | non-DMD   | No sign of muscle pathology on histology.                                | Biopsy   | Japan       |
| 3        | 4   | non-DMD   | No sign of muscle pathology on histology.                                | Biopsy   | Japan       |
| 4        | 8   | non-DMD   | No sign of muscle pathology on histology.                                | Biopsy   | Japan       |
| 5        | 10  | non-DMD   | No sign of muscle pathology on histology.                                | Biopsy   | Japan       |
| 6        | 10  | non-DMD   | No sign of muscle pathology on histology.                                | Biopsy   | Japan       |
| 7        | 14  | non-DMD   | No sign of muscle pathology on histology.                                | Biopsy   | Japan       |
| 8        | 15  | non-DMD   | No sign of muscle pathology on histology.                                | Biopsy   | Japan       |
| 9        | 18  | non-DMD   | No sign of muscle pathology on histology.                                | Biopsy   | Japan       |
| 10       | 32  | non-DMD   | No sign of muscle pathology on histology.                                | Biopsy   | Japan       |
| 11       | 2   | DMD       | exon66: c. 9568C>T (R3190X)                                              | Biopsy   | Japan       |
| 12       | 2   | DMD       | exon33: c.4540G>T (E1514X)                                               | Biopsy   | Japan       |
| 13       | 2   | DMD       | exon33: c.4540G>T (E1514X)                                               | Biopsy   | Japan       |
| 14       | 2   | DMD       | exon53_55del                                                             | Biopsy   | Japan       |
| 15       | 3   | DMD       | exon7: c.568C>T (Q190X)                                                  | Biopsy   | Japan       |
| 16       | 3   | DMD       | exon21: c. 2701G>T (G901X)                                               | Biopsy   | Japan       |
| 17       | 3   | DMD       | exon59: c.8713C>T (R2905X)                                               | Biopsy   | Japan       |
| 18       | 3   | DMD       | exon62: c.9204_9207delCAAA (N3068KfsX20)                                 | Biopsy   | Japan       |
| 19       | 3   | DMD       | exon23: c.3079G>T (G1027X)                                               | Biopsy   | Japan       |
| 20       | 4   | DMD       | exon14: c. 1663C>T (Q555X)                                               | Biopsy   | Japan       |
| 21       | 4   | DMD       | exon20_29del                                                             | Biopsy   | Japan       |
| 22       | 5   | DMD       | exon10: c.1087C>T (Q363X)                                                | Biopsy   | Japan       |
| 23       | 5   | DMD       | exon41: c.5867G>A (W1956X)                                               | Biopsy   | Japan       |
| 24       | 5   | DMD       | exon8_17dup                                                              | Biopsy   | Japan       |
| 25       | 6   | DMD       | exon41: c.5758C>T (Q1920X)                                               | Biopsy   | Japan       |
| 26       | 6   | DMD       | exon59: c.8692C>T (Q2898X)                                               | Biopsy   | Japan       |
| 27       | 8   | DMD       | exon13: c.1533_1536delTCAC (H512WfsX4)                                   | Biopsy   | Japan       |
| 28       | 9   | DMD       | exon20: c.2435G>A (W812X)                                                | Biopsy   | Japan       |
| 29       | 9   | DMD       | exon48_50del                                                             | Biopsy   | Japan       |
| 30       | 10  | DMD       | Intron6: c.530+1G>A                                                      | Biopsy   | Egypt       |
| 31       | 10  | DMD       | Decreased immunoreactivity to dystrophin. Typical clinical signs of DMD. | Biopsy   | Japan       |
| 32       | 10  | DMD       | Decreased immunoreactivity to dystrophin. Typical clinical signs of DMD. | Biopsy   | Japan       |
| 33       | 10  | DMD       | exon17_44dup                                                             | Biopsy   | Japan       |
| 34       | 11  | DMD       | Decreased immunoreactivity to dystrophin. Typical clinical signs of DMD. | Biopsy   | Japan       |
| 35       | 11  | DMD       | Decreased immunoreactivity to dystrophin. Typical clinical signs of DMD. | Biopsy   | Myanmar     |
| 36       | 12  | DMD       | Decreased immunoreactivity to dystrophin. Typical clinical signs of DMD. | Biopsy   | Japan       |
| 37       | 12  | DMD       | Decreased immunoreactivity to dystrophin. Typical clinical signs of DMD. | Biopsy   | Japan       |
| 38       | 13  | DMD       | Decreased immunoreactivity to dystrophin. Typical clinical signs of DMD. | Biopsy   | Japan       |
| 39       | 14  | DMD       | Decreased immunoreactivity to dystrophin. Typical clinical signs of DMD. | Biopsy   | Japan       |
| 40       | 14  | DMD       | Decreased immunoreactivity to dystrophin. Typical clinical signs of DMD. | Biopsy   | Japan       |
| 41       | 20  | DMD       | exon12, 13, 17 19del                                                     | Autopsy  | Japan       |
| 42       | 23  | DMD       | Decreased immunoreactivity to dystrophin. Typical clinical signs of DMD. | Autopsy  | Japan       |
| 43       | 26  | DMD       | exon43: c. 6283C>T (R2095X)                                              | Autopsy  | Japan       |
| 44       | 33  | DMD       | Decreased immunoreactivity to dystrophin. Typical clinical signs of DMD. | Autopsy  | Japan       |

Supplementary Figure 1

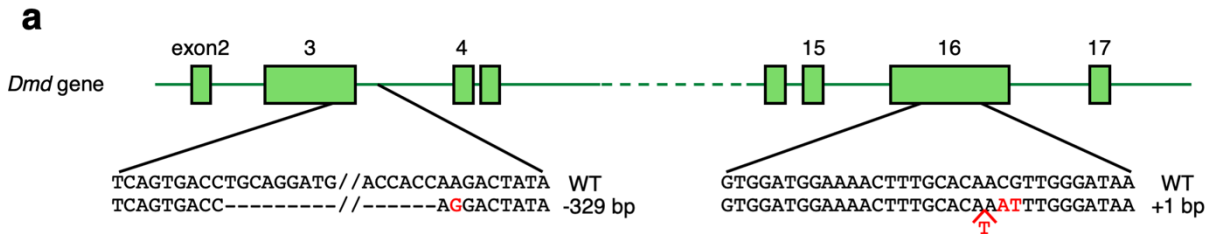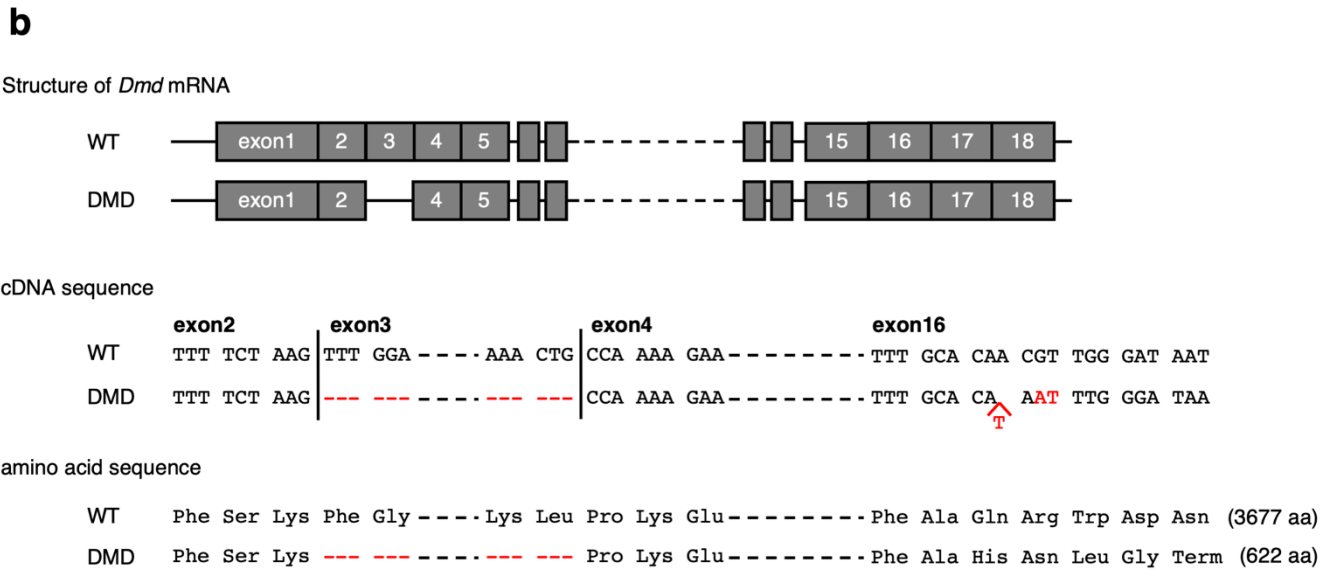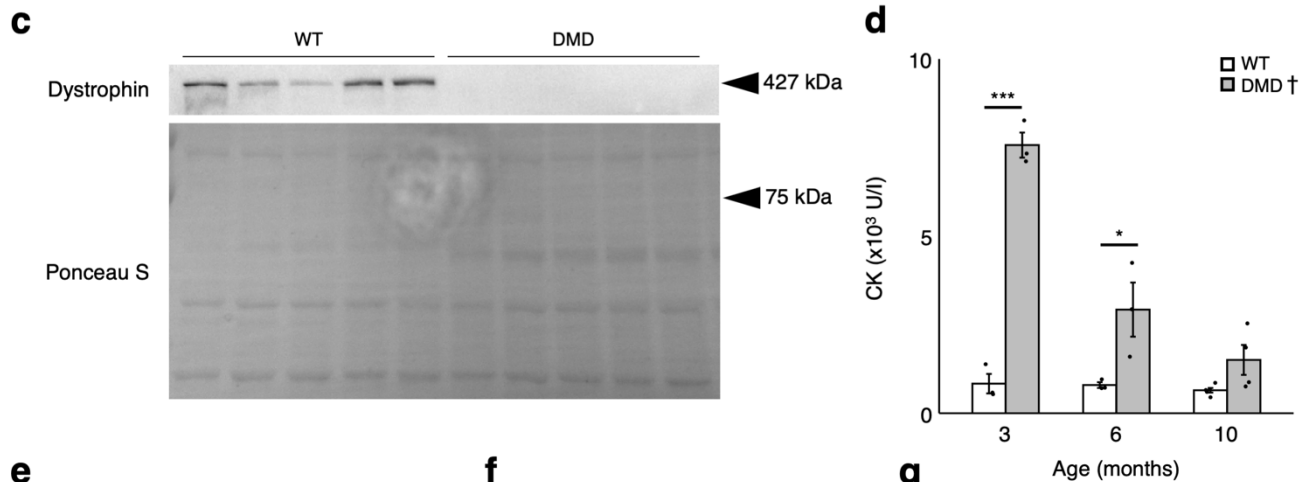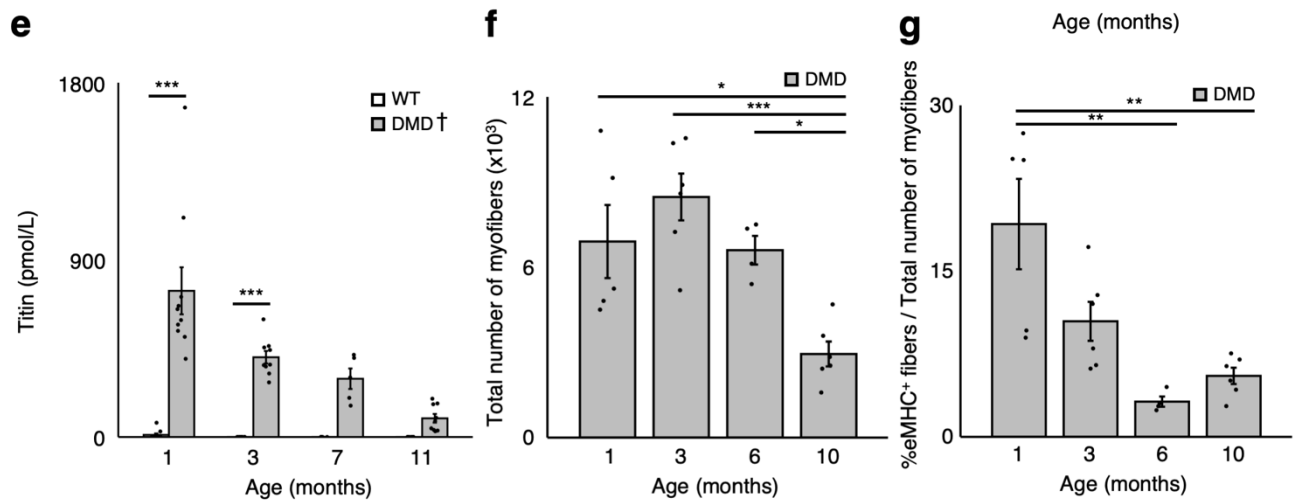

**Supplementary Figure 1. *Dmd* gene mutation pattern and elevated biochemical markers of muscular damage in DMD rats.** (a) Sequence of the *Dmd* gene in DMD rats. (b) Structure and cDNA sequence of *Dmd* mRNA in WT and DMD rats. Deletion of splice site in intron2 as indicated in (a) leads to exon3 skipping in DMD rats. One base insertion in exon16 causes the generation of a stop codon as indicated in the amino acid sequence below. Term = stop codon. aa = amino acids. (c) Immunoblotting analysis of dystrophin expression using an antibody to detect dystrophin C-terminus in 3 month-old WT and DMD rats. Full-length blots are presented in Supplementary Figure 6b. (d) Serum creatine kinase (CK) activity in WT and DMD rats (WT: n=3, 3, 5; DMD: n=3, 3, 4). (e) Urinary titin concentrations in WT and DMD rats (WT: n=10, 9, 5, 9; DMD: n=10, 9, 5, 9). (f,g) (f) Total number of myofibers was counted in the TA muscle sections, and (g) the number of eMHC<sup>+</sup> myofibers was divided by the total number of myofibers. Data are expressed as means+SEM, and were compared by Tukey Kramer's test. For (d) and (e), the result of statistical comparison only between the genotypes at each indicated ages was displayed. When a significant age-related difference was observed by the Tukey-Kramer's test, the † mark was added beside the legend of the graph. \*p<0.05. \*\*p<0.01. \*\*\*p<0.001.

Supplementary Figure 2

**a**

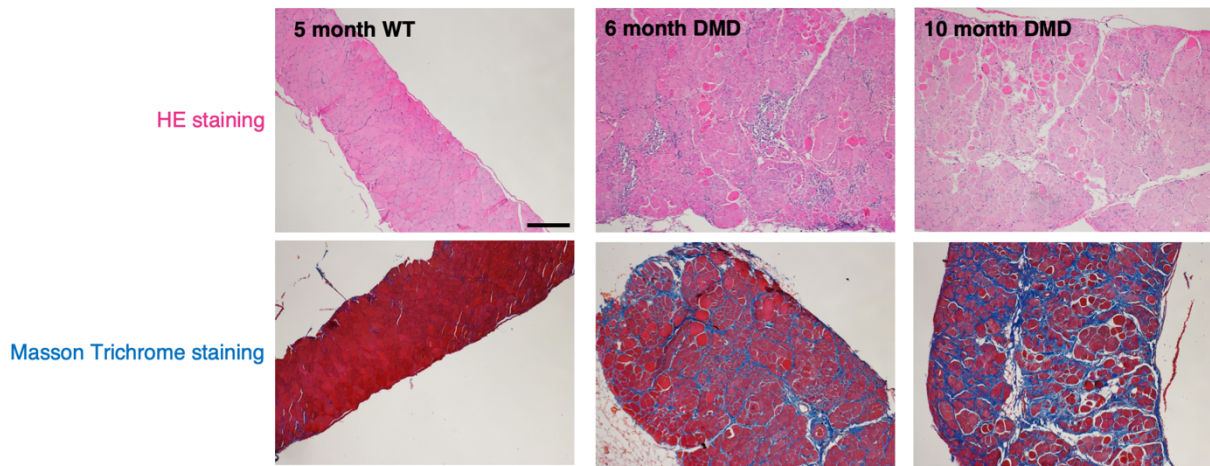

**b**

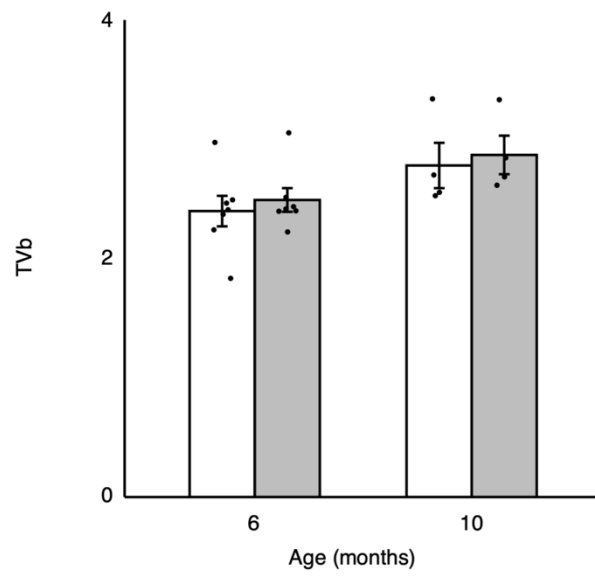

**Supplementary Figure 2. Progressive exacerbation of histopathology of the diaphragm in DMD rats without functional decline.** **(a)** Histological analysis of diaphragms by HE staining (upper panel) and Masson Trichrome staining (lower panel) from 5 to 10 month-old WT and DMD rats. Scale bar = 250  $\mu\text{m}$ . **(b)** Tidal volume breathing (TVb) was measured as an indicator of respiratory function in WT and DMD rats aged 6 and 9 months (WT: n=7, 4; DMD: n=7, 4). Data are expressed as means+SEM. The p value was determined by unpaired student's *t*-test.





**a**

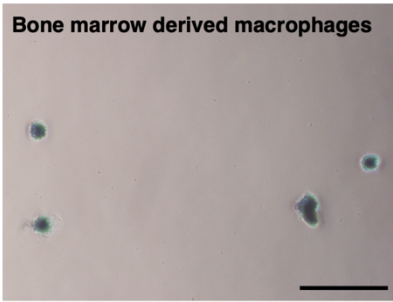

**b**

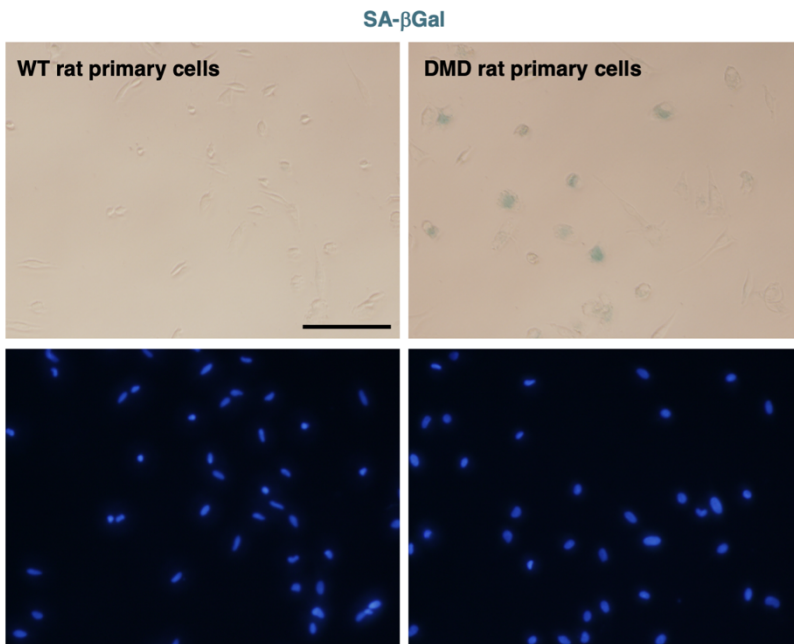

**c**

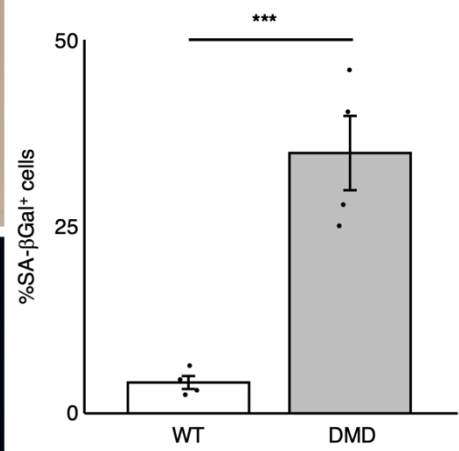

**d**

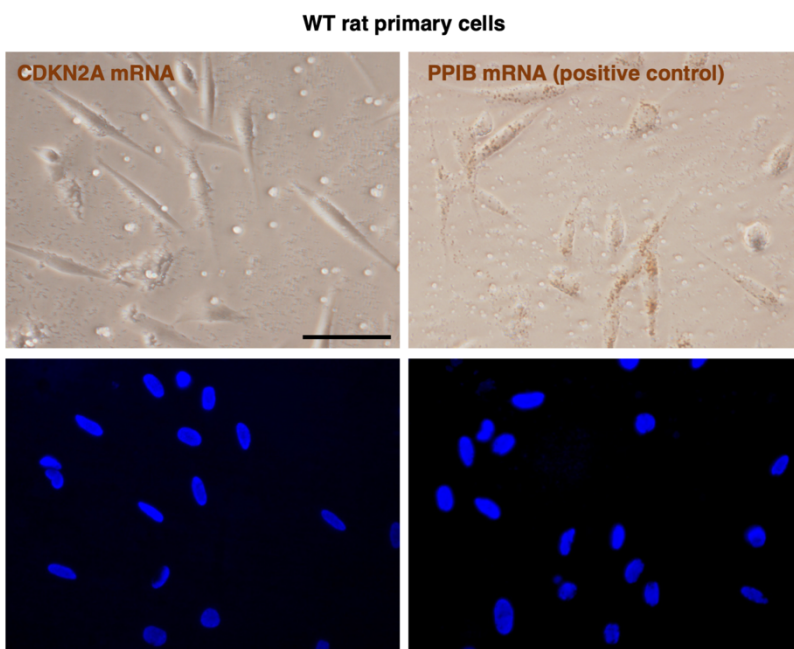

**Supplementary Figure 3. Senescence induction in DMD rats.** **(a)** SA- $\beta$ Gal staining was performed in Bone marrow derived macrophages. Almost all the macrophages were SA- $\beta$ Gal<sup>+</sup>. Scale bar = 200  $\mu$ m. **(b)** CD45<sup>+</sup> cells were MACS-depleted, and SA- $\beta$ Gal staining was performed in 3 months old WT and DMD rat skeletal muscle primary cells. Scale bar = 200  $\mu$ m. **(c)** Quantification of SA- $\beta$ Gal<sup>+</sup> cells per field (WT: n=4, DMD: n=4). **(d)** In situ hybridization of CDKN2A mRNA using RNAscope on skeletal muscle primary cells from 3-month-old WT rats. Peptidyl-prolyl cis-trans isomerase B (PPIB) mRNA was used for the positive control of in situ hybridization. Scale bar = 100  $\mu$ m. Data are expressed as means $\pm$ SEM, and were compared with *t*-test. \*\*\**p*<0.001.

Supplementary Figure 4

**a**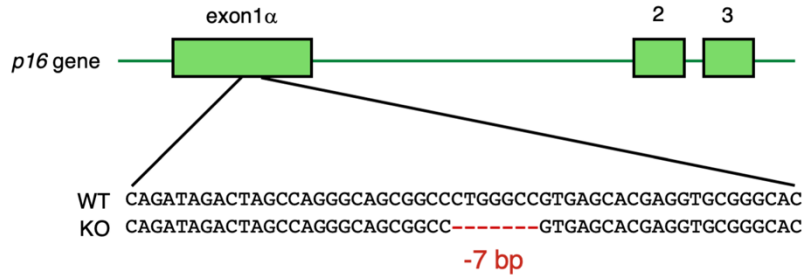**b**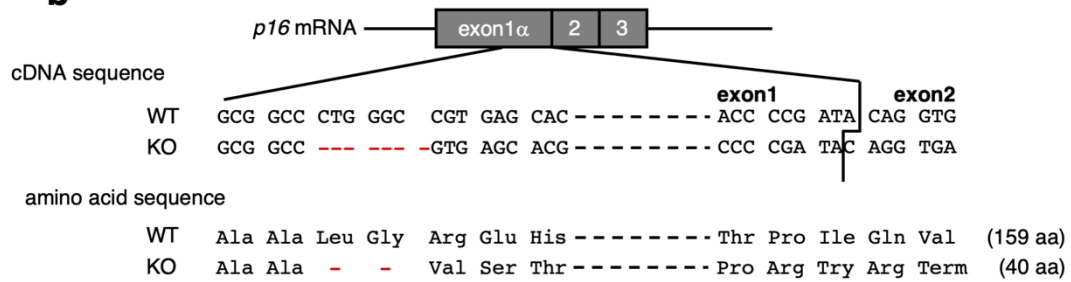**c**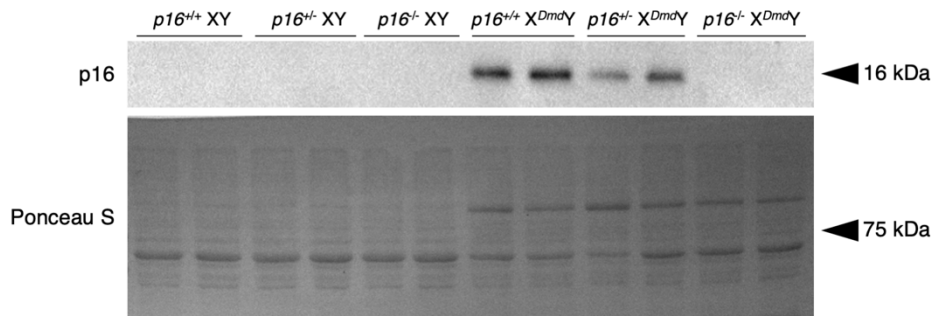**d**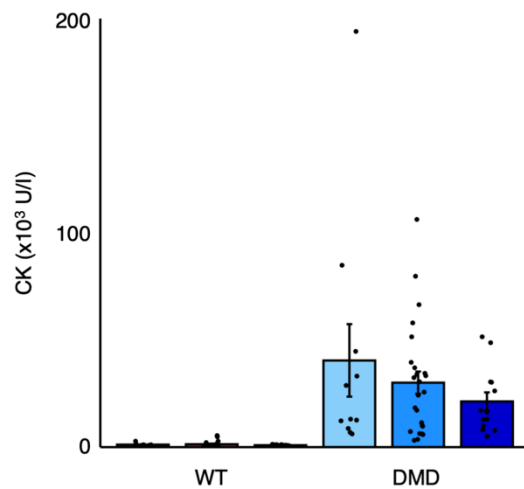

**Supplementary Figure 4. *p16* gene mutation pattern and elevated biochemical markers of muscular damage in dKO rats.** (a) Sequence of the *p16* gene in DMD rats. (b) cDNA sequence of *p16* mRNA in WT and DMD rats. The seven base deletions in exon1 $\alpha$  results in a stop codon, as indicated in the amino acid sequence below. Term = stop codon. aa = amino acids. (c) Immunoblotting analysis of p16 expression in 9 month-old p16<sup>+/+</sup>, p16<sup>+/-</sup>, and p16<sup>-/-</sup> background WT and DMD rats. Full-length blots are presented in Supplementary Figure 6c. (d) Serum creatine kinase (CK) activity in 9 month-old p16<sup>+/+</sup>, p16<sup>+/-</sup>, and p16<sup>-/-</sup> background WT and DMD rats (n=9, 22, 17, 11, 25, 13). Data are compared by Tukey Kramer's test. Tukey Kramer's test was performed only between WT background groups, or between DMD background groups. Data are expressed as means+SEM.



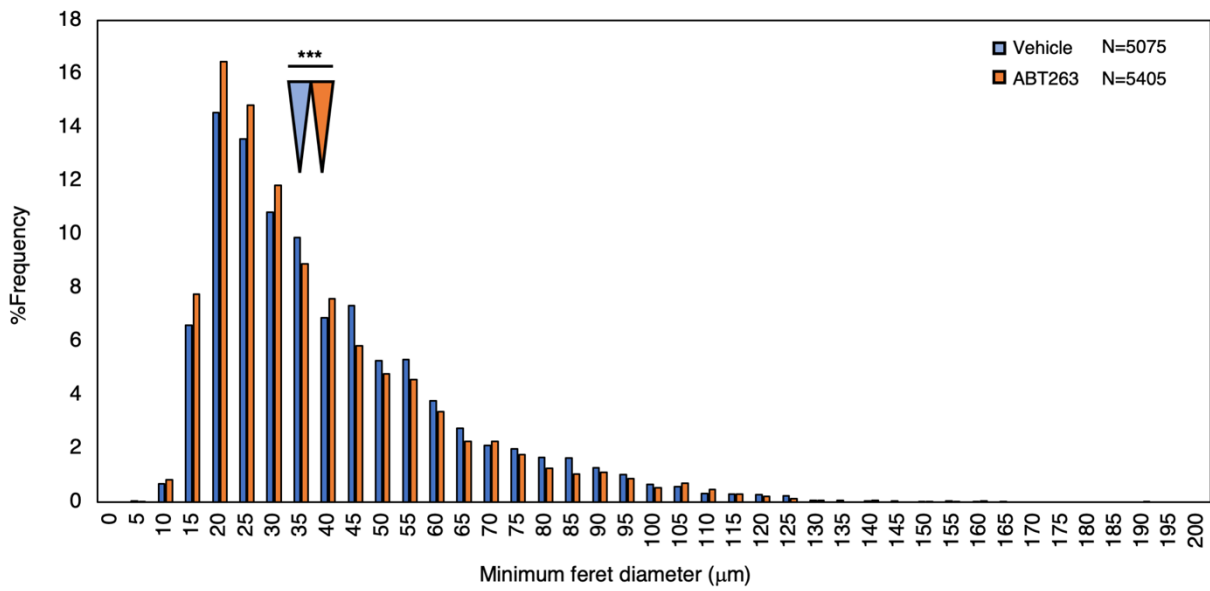



**Supplementary Figure 5. ABT263 partially restores myofiber size.** The size of each fiber was determined using CellProfiler software (Vehicle: n=5075, ABT263: n=5405). Arrowheads indicate the median value of myofiber size. Data are expressed as histogram, and median values were compared with Wilcoxon rank sum test. \*\*\* $p < 0.001$ .



**a**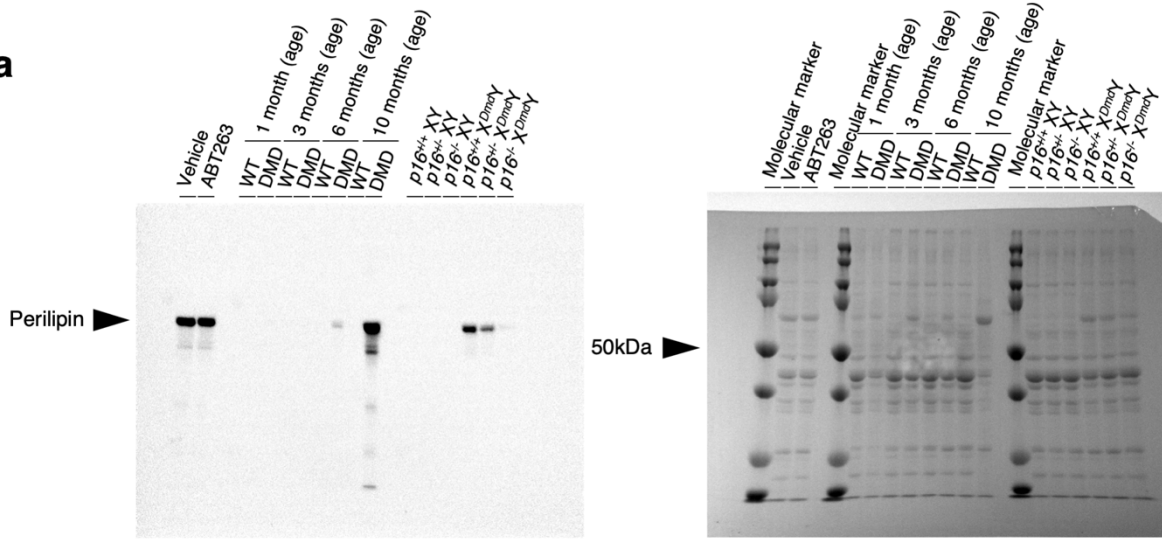**b**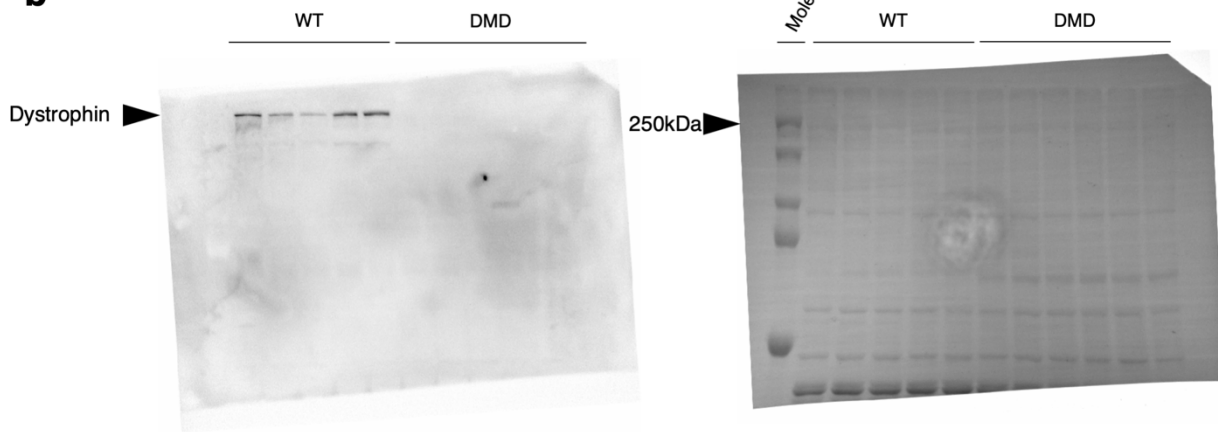**c**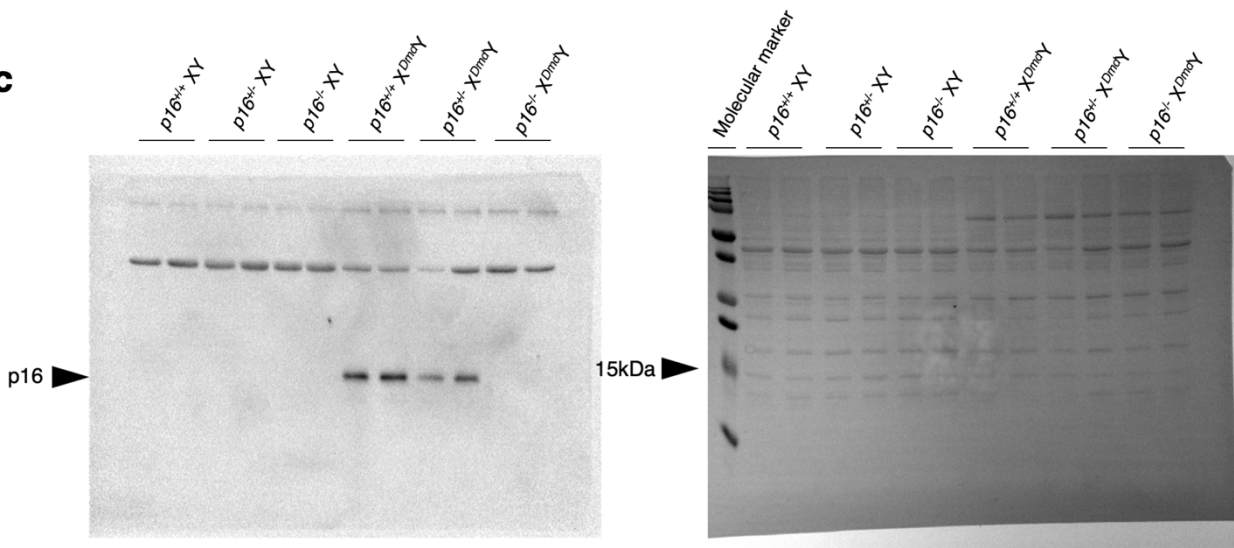

**Supplementary Figure 6. Full-length images of blots.** (a) Full-length blots of perilipin (left panel) and corresponding Ponceau staining (right panel). (b) Full-length blots of dystrophin (left panel) and corresponding Ponceau staining (right panel). (c) Full-length blots of p16 (left panel) and corresponding Ponceau staining (right panel).
